# Supplementary material for: SLAM family member 8 is expressed in and enhances the growth of anaplastic large cell lymphoma
Source: PubMed Central journal article supplement (PMC7018816; doi:10.1038/s41598-020-59530-1), 2020-02-13
Supplement: 41598_2020_59530_MOESM1_ESM.pdf [file 41598_2020_59530_MOESM1_ESM.pdf]

SREP-18-43975C

SLAM family member 8 is expressed in and enhances the growth of anaplastic large cell lymphoma.

Akihiko Sugimoto,<sup>a</sup> \*Tatsuki R. Kataoka,<sup>a</sup> Hiroaki Ito,<sup>a</sup> Kyohei Kitamura,<sup>a</sup> Narumi Saito,<sup>a</sup> Masahiro Hirata,<sup>a</sup> Chiyuki Ueshima,<sup>a</sup> Yusuke Takei,<sup>a,b</sup> Koki Moriyoshi,<sup>a,c</sup> Yasuyuki Otsuka,<sup>d</sup> Momoko Nishikori,<sup>d</sup> Akifumi Takaori-Kondo,<sup>d</sup> and Hironori Haga.<sup>a</sup>

<sup>a</sup> Department of Diagnostic Pathology and <sup>d</sup> Department of Hematology/Oncology, Kyoto University Hospital, Kyoto, Japan

<sup>b</sup> Department of Diagnostic Pathology, Saiseikai-Noe Hospital, Osaka , Japan

<sup>c</sup> Department of Diagnostic Pathology, Kyoto Medical Center, Kyoto, Japan

**Figure 1 suppl files**

**(A) RTPCR**

SLAMF8

Lane 1, Marker; Lane 2, U937; Lane 3, K562; Lane 4, Karpas299; Lane 5, SU-DHL-1.

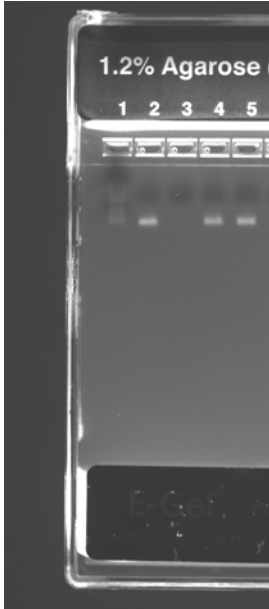

GAPDH

Lane 7, Marker; Lane 8, U937; Lane 9, K562; Lane 10, Karpas299; Lane 11, SU-DHL-1.

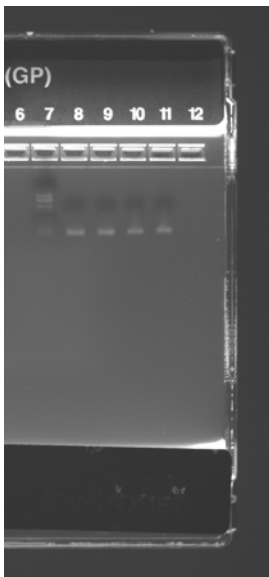

**(B) Immunoblotting**

SLAMF8

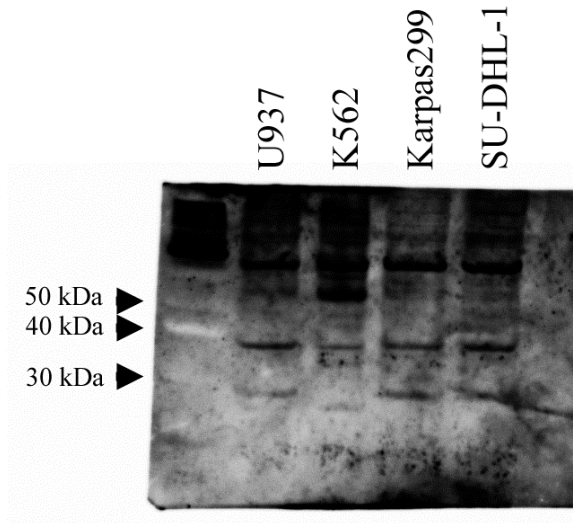

GAPDH

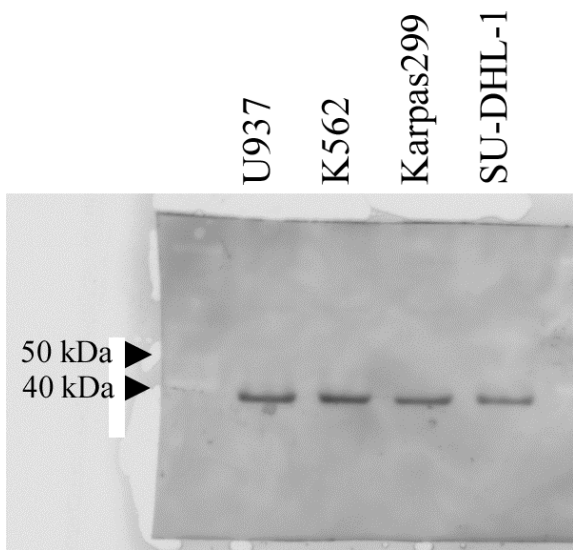

### (C) RTPCR

#### SLAMF8

Lane 1, Marker; Lane 2, Marker; Lane 3, Blank; Lane 4, Karpas299 untreated; Lane 5, Karpas299 crizotinib-treated for 24 h; Lane 6, Karpas299 crizotinib-treated for 48 h; Lane 7, Blank; Lane 8, SU-DHL-1 untreated; Lane 9, SU-DHL-1 crizotinib-treated for 24 h; Lane 10, SU-DHL-1 crizotinib-treated for 48 h; Lane 11, Blank; Lane 12, Marker.

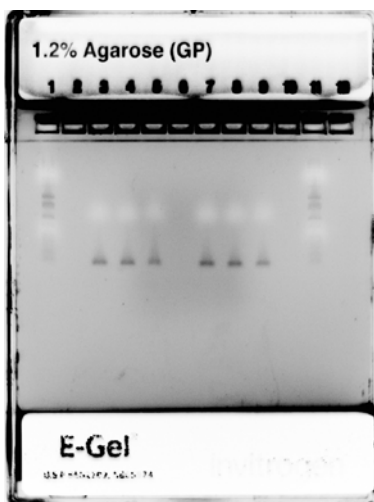

#### GAPDH

Lane 1, Marker; Lane 2, Marker; Lane 3, Blank; Lane 4, Karpas299 untreated; Lane 5, Karpas299 crizotinib-treated for 24 h; Lane 6, Karpas299 crizotinib-treated for 48 h; Lane 7, Blank; Lane 8, SU-DHL-1 untreated; Lane 9, SU-DHL-1 crizotinib-treated for 24 h; Lane 10, SU-DHL-1 crizotinib-treated for 48 h; Lane 11, Blank; Lane 12, Marker.

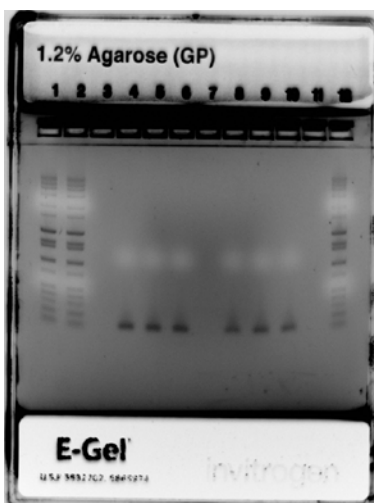

**(D) Immunoblotting**

SLAMF8

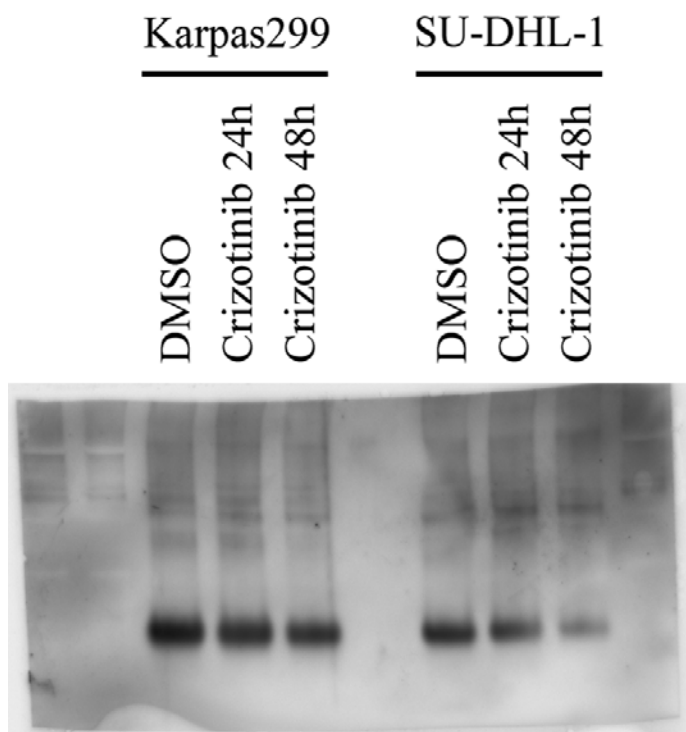

pALK

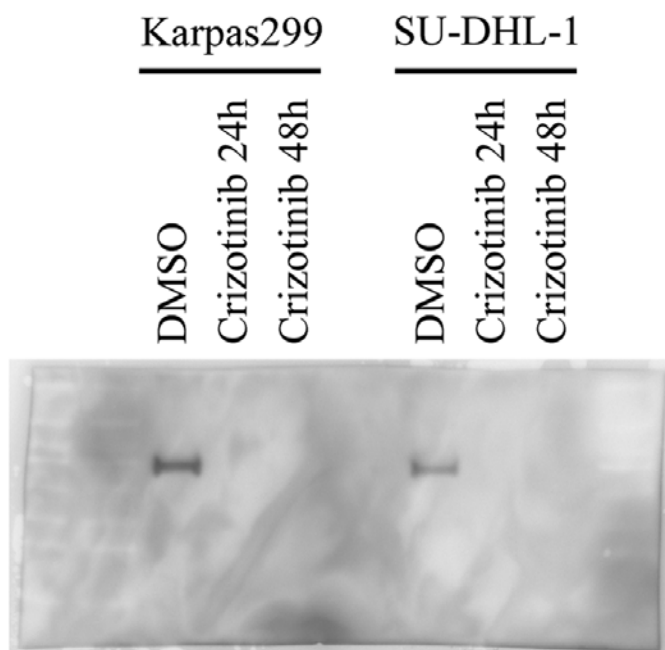

GAPDH

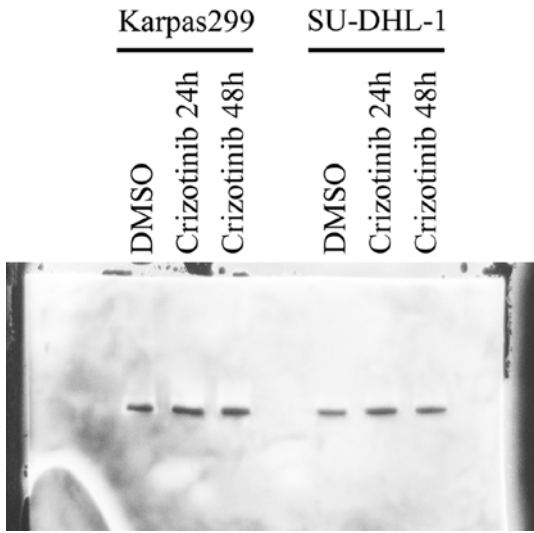

**(F) RT-PCR**

SLAMF8

Lane 1, Marker; Lane 2, Lymph node; Lane 3, Tonsil; Lane 4, Case #1; Lane 5, Case #3;  
Lane 6, Case #10; Lane 7, Case #15; Lane 8, Marker.

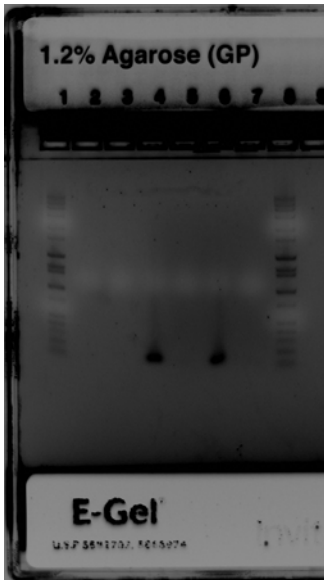

GAPDH

Lane 5, Marker; Lane 6, Lymph node; Lane 7, Tonsil; Lane 8, Case #1; Lane 9, Case #3;  
Lane 10, Case #10; Lane 11, Case #15; Lane 12, Marker.

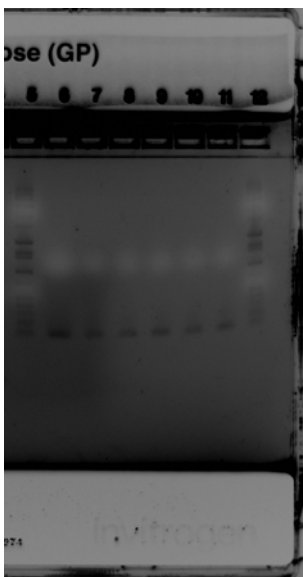

END
