# Supplementary material for: SLAM family member 8 is expressed in and enhances the growth of anaplastic large cell lymphoma
Source: PubMed Central journal article supplement (PMC7018816; doi:10.1038/s41598-020-59530-1), 2020-02-13

SREP-18-43975C

SLAM family member 8 is expressed in and enhances the growth of anaplastic large cell lymphoma.

Akihiko Sugimoto,<sup>a</sup> \*Tatsuki R. Kataoka,<sup>a</sup> Hiroaki Ito,<sup>a</sup> Kyohei Kitamura,<sup>a</sup> Narumi Saito,<sup>a</sup> Masahiro Hirata,<sup>a</sup> Chiyuki Ueshima,<sup>a</sup> Yusuke Takei,<sup>a,b</sup> Koki Moriyoshi,<sup>a,c</sup> Yasuyuki Otsuka,<sup>d</sup> Momoko Nishikori,<sup>d</sup> Akifumi Takaori-Kondo,<sup>d</sup> and Hironori Haga.<sup>a</sup>

<sup>a</sup> Department of Diagnostic Pathology and <sup>d</sup> Department of Hematology/Oncology, Kyoto University Hospital, Kyoto, Japan

<sup>b</sup> Department of Diagnostic Pathology, Saiseikai-Noe Hospital, Osaka , Japan

<sup>c</sup> Department of Diagnostic Pathology, Kyoto Medical Center, Kyoto, Japan

**Figure 2 suppl files**

Immunoblotting; SLAMF8 (upper) & GAPDH (bottom)

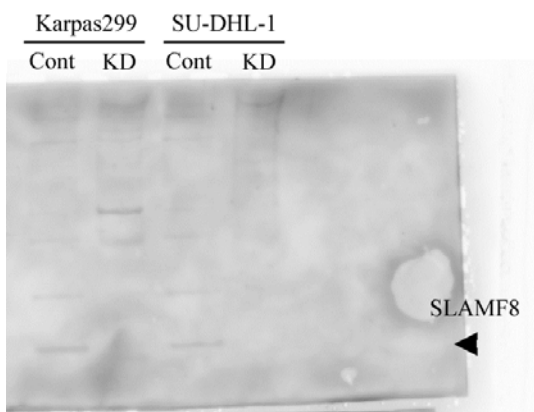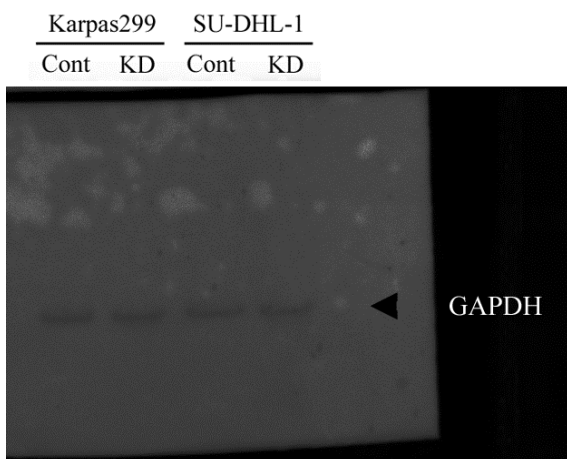

Supplement: 41598_2020_59530_MOESM2_ESM.pdf [file 41598_2020_59530_MOESM2_ESM.pdf]
